# Supplementary material for: Successive oxidation–condensation reactions using a multifunctional gold-supported nanocomposite (Au/MgCe–HDO)
Source: Royal Society of Chemistry journal article supplement (doi:10.1039/d1nj05690e), 2022-01-01

## Successive Oxidation- Condensation Reactions using Multifunctional Gold supported Nanocomposite (Au/MgCe-HDO)

Loveneesh Kumar<sup>a</sup>, Nishant Verma<sup>a</sup>, Hitesh Sehrawat<sup>a</sup>, Ravi Tomar<sup>a,b</sup>, Rupesh Kumar<sup>a,c,#</sup>, Ramesh Chandra<sup>a,d,\*</sup>

[a] *Drug Discovery & Development Laboratory,  
Department of Chemistry,  
University of Delhi,  
Delhi 110007, India.*

*Email:* [acbrdu@hotmail.com](mailto:acbrdu@hotmail.com),  
[rameshchandragroup@gmail.com](mailto:rameshchandragroup@gmail.com)

[rchandra@chemistry.du.ac.in](mailto:rchandra@chemistry.du.ac.in),

[b] *Department of Chemistry,  
Faculty of Science,  
SGT University,  
Gurugram,  
Haryana-122505, India.*

[c] *Department of Chemistry,  
Kirori Mal College,  
University of Delhi,  
Delhi 110007, India.*

[d] *Dr. B. R. Ambedkar, Centre for Biomedical Research,  
University of Delhi,  
Delhi 110007, India.*

# *Under Mentorship Program for College Teachers*

## Supporting Information:

### Reaction Procedure for oxidation of benzyl alcohol

For every reaction, Schlenk tube was taken along with 0.5 mmol alcohol, 50 mg catalyst and 3mL toluene was taken as solvent. The reaction mixture was then stirred vigorously at 373 K for 2-3 hours. The resulting reaction mixture was then filtered for the removal of catalyst. The filtrate was then dried over anhydrous sodium sulphate. The purification was done using 5% (v/v) ethyl acetate/hexane as eluent to obtain the desired product. The final product was characterized with <sup>1</sup>H-NMR and <sup>13</sup>C-NMR.

### Reaction Procedure for Successive oxidation-condensation reaction with malonitrile/ethyl cyanoacetate/acetophenone.

For every reaction, Schlenk tube was taken along with 0.5 mmol alcohol, 50 mg catalyst and 3mL toluene was taken as solvent. The reaction mixture was then stirred vigorously at 373 K for 4-6 hours. Add 1mmol malonitrile/ethyl cyanoacetate/acetophenone after formation of corresponding aldehyde as suggested by TLC technique. The resulting reaction mixture was then filtered for the removal of catalyst. The filtrate was then dried over anhydrous sodium sulphate. The purification was done using 5% (v/v) ethyl acetate/hexane as eluent to obtain the desired product. The final product was characterized with <sup>1</sup>H-NMR and <sup>13</sup>C-NMR.

### Calculation for yield:

$$\text{Yield (\%)} = \frac{\text{amount of product formed (in mmol)}}{\text{amount of reactant taken (in mmol)}} \times 100$$

### Calculation for metal loading:

$$\text{Metal loading} = \frac{\text{Concentration of metal (ppm)} \times \text{Volume of extract (Litre)}}{\text{Weight of solid sample taken for extraction (grams)}}$$

### Calculation for mol% of catalyst:

$$\text{Mol \% of catalyst used} = \frac{\text{no. of moles of catalyst used}}{(\text{no. of moles of catalyst used} + \text{no. of moles of limiting reagent})} \times 100$$

## SEM-EDX data

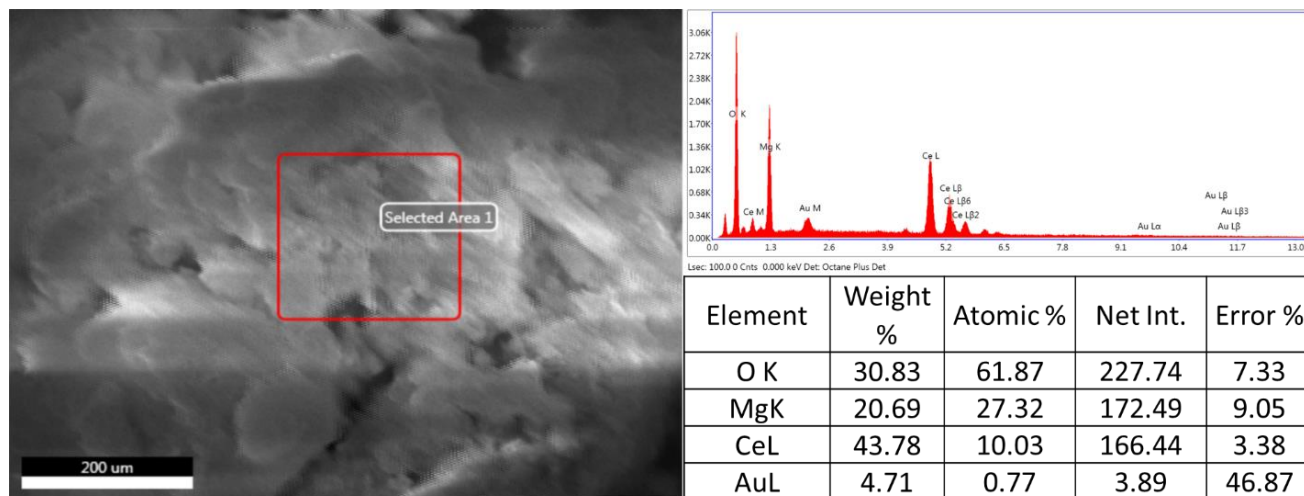

Figure- S1 SEM-EDX of Au/MgCe-HDO nanocomposite., Spectrum, Table of SEM-EDS

## NMR spectra:

**(2a) 2-nitrobenzaldehyde:**  $^1\text{H}$  NMR (400 MHz,  $\text{CDCl}_3$ )  $\delta$  (ppm) 10.43 (s, 1H), 8.13 (dd,  $J = 7.6$ , 1.1 Hz, 1H), 7.96 (dd,  $J = 7.4$ , 1.6 Hz, 1H), 7.85-7.75 (m, 2H);  $^{13}\text{C}$  NMR (100 MHz,  $\text{CDCl}_3$ )  $\delta$  (ppm) 188.152, 149.575, 134.081, 133.712, 131.337, 129.626, 124.492

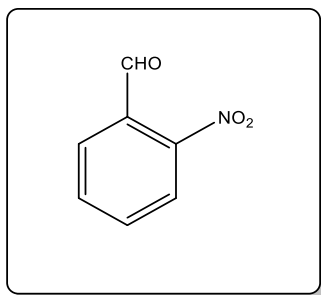

**(2d) 2-methoxybenzaldehyde:**  $^1\text{H}$  NMR (400 MHz,  $\text{CDCl}_3$ )  $\delta$  (ppm) 9.88 (s, 1H), 7.84 (d,  $J = 8.8$  Hz, 2H), 7.00 (d,  $J = 8.8$  Hz, 2H), 3.89 (s, 3H);  $^{13}\text{C}$  NMR (100 MHz,  $\text{CDCl}_3$ )  $\delta$  (ppm) 190.817, 164.607, 131.972, 129.936, 114.409, 55.576

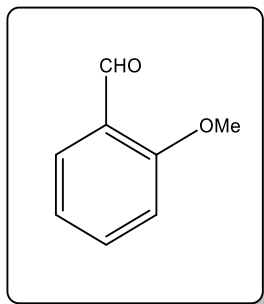

**(2g) 2-methylbenzaldehyde:**  $^1\text{H}$  NMR (400 MHz,  $\text{CDCl}_3$ )  $\delta$  (ppm) 10.29 (s, 1H), 7.82 (d,  $J = 7.8$  Hz, 1H), 7.50 (td,  $J = 7.5, 1.3$  Hz, 1H), 7.38 (t,  $J = 7.5$  Hz, 1H), 7.28 (d,  $J = 7.5$  Hz, 1H), 2.71-2.68 (3H);  $^{13}\text{C}$  NMR (100 MHz,  $\text{CDCl}_3$ )  $\delta$  (ppm) 192.817, 140.622, 134.153, 133.647, 132.045, 131.770, 126.326, 19.590

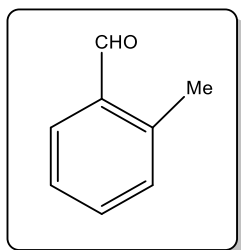

**(4b) 2-(4-nitrobenzylidene)malononitrile:**  $^1\text{H}$  NMR (400 MHz,  $\text{CDCl}_3$ )  $\delta$  (ppm) 8.37 (d,  $J = 8.8$  Hz, 2H), 8.06 (d,  $J = 8.7$  Hz, 2H), 7.87 (s, 1H);  $^{13}\text{C}$  NMR (100 MHz,  $\text{CDCl}_3$ )  $\delta$  (ppm) 157.021, 150.426, 135.886, 131.419, 124.739, 112.729, 111.703, 87.597

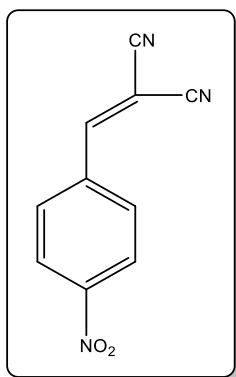

**(4e) 2-(4-methoxybenzylidene)malononitrile:**  $^1\text{H}$  NMR (400 MHz,  $\text{CDCl}_3$ )  $\delta$  (ppm) 7.89 (d,  $J = 8.9$  Hz, 2H), 7.64 (s, 1H), 7.00 (d,  $J = 8.9$  Hz, 2H), 3.90 (s, 3H);  $^{13}\text{C}$  NMR (100 MHz,  $\text{CDCl}_3$ )  $\delta$  (ppm) 164.928, 159.014, 133.576, 124.106, 115.230, 114.550, 113.467, 78.568, 55.919.

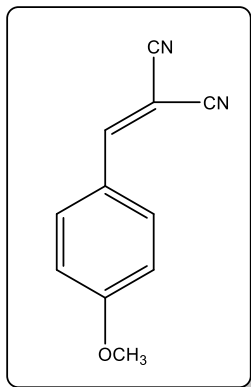

**(4h) 2-(4-methylbenzylidene)malononitrile:**  $^1\text{H}$  NMR (400 MHz,  $\text{CDCl}_3$ )  $\delta$  (ppm) 7.83 (d,  $J$  = 8.0 Hz, 2H), 7.74 (s, 1H), 7.41-7.32 (2H), 2.48 (s, 3H);  $^{13}\text{C}$  NMR (100 MHz,  $\text{CDCl}_3$ )  $\delta$  (ppm) 159.842, 146.427, 130.940, 130.398, 128.478, 114.059, 112.904, 81.135, 22.038

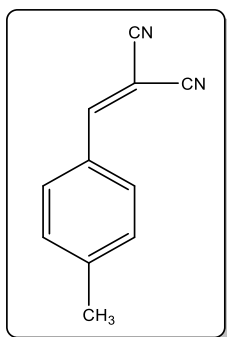

**(6a) ethyl (Z)-2-cyano-3-(2-nitrophenyl)acrylate:**  $^1\text{H}$ -NMR (400 MHz,  $\text{CDCl}_3$ )  $\delta$  (ppm) 8.74 (s, 1H), 8.30 (d,  $J$  = 8.3 Hz, 1H), 7.92-7.80 (m, 2H), 7.74 (t,  $J$  = 7.1 Hz, 1H), 4.44 (q,  $J$  = 7.2 Hz, 2H), 1.43 (t,  $J$  = 7.1 Hz, 3H);  $^{13}\text{C}$  NMR (100 MHz,  $\text{CDCl}_3$ )  $\delta$  (ppm) 161.034, 153.135, 147.380, 134.521, 132.211, 130.608, 128.131, 125.438, 113.915, 108.644, 63.186, 14.117

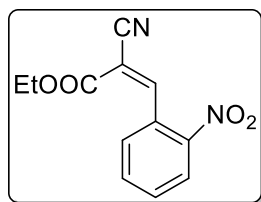

**(6b) ethyl (Z)-2-cyano-3-(4-nitrophenyl)acrylate:**  $^1\text{H}$ -NMR (400 MHz,  $\text{CDCl}_3$ )  $\delta$  (ppm) 8.33 (d,  $J$  = 8.7 Hz, 2H), 8.29 (s, 1H), 8.12 (d,  $J$  = 8.8 Hz, 2H), 4.40 (q,  $J$  = 7.1 Hz, 2H), 1.40 (t,  $J$  = 7.1 Hz, 3H);  $^{13}\text{C}$  NMR (100 MHz,  $\text{CDCl}_3$ )  $\delta$  (ppm) 161.395, 151.705, 149.727, 136.904, 131.496, 124.312, 114.514, 107.409, 63.345, 14.110

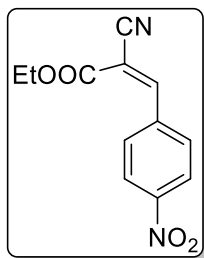

**(6c) ethyl (Z)-2-cyano-3-(3-nitrophenyl)acrylate:**  $^1\text{H-NMR}$  (400 MHz,  $\text{CDCl}_3$ )  $\delta$  (ppm) 8.68 (s, 1H), 8.44-8.34 (m, 2H), 8.29 (s, 1H), 7.72 (t,  $J = 8.0$  Hz, 1H), 4.40 (q,  $J = 7.2$  Hz, 2H), 1.40 (t,  $J = 7.2$  Hz, 3H);  $^{13}\text{C NMR}$  (100 MHz,  $\text{CDCl}_3$ )  $\delta$  (ppm) 161.550, 151.948, 148.661, 135.274, 132.955, 130.636, 127.148, 125.988, 114.633, 106.698, 63.356, 14.187

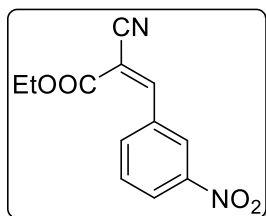

**(6d) ethyl (Z)-2-cyano-3-(4-nitrophenyl)acrylate:**  $^1\text{H-NMR}$  (400 MHz,  $\text{CDCl}_3$ )  $\delta$  (ppm) 8.23 (s, 1H), 8.04 (d,  $J = 8.4$  Hz, 2H), 7.78 (d,  $J = 8.4$  Hz, 2H), 4.39 (q,  $J = 7.1$  Hz, 2H), 1.39 (t,  $J = 7.1$  Hz, 3H);  $^{13}\text{C NMR}$  (100 MHz,  $\text{CDCl}_3$ )  $\delta$  (ppm) 161.598, 152.341, 135.322, 132.936, 131.086, 117.786, 116.070, 114.700, 106.852, 63.356, 14.187

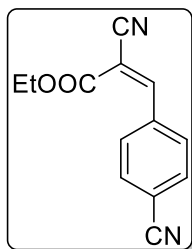

**(8a) (E)-3-(2-nitrophenyl)-1-phenylprop-2-en-1-one:**  $^1\text{H-NMR}$  (400 MHz,  $\text{CDCl}_3$ )  $\delta$  (ppm) 8.12 (d,  $J = 15.8$  Hz, 1H), 8.06 (dd,  $J = 8.2, 1.1$  Hz, 1H), 8.03-7.98 (m, 2H), 7.73 (dd,  $J = 7.8, 1.4$  Hz, 1H), 7.71-7.65 (m, 1H), 7.62-7.55 (m, 2H), 7.55-7.48 (m, 2H), 7.31 (d,  $J = 15.8$  Hz, 1H);  $^{13}\text{C NMR}$  (100 MHz,  $\text{CDCl}_3$ )  $\delta$  (ppm) 190.624, 148.623, 140.334, 137.478, 133.693, 133.271, 131.451, 130.464, 129.361, 128.902, 128.834, 127.445, 125.116.

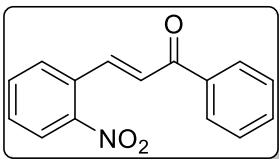

## NMR Spectra:

### (2a) 2-nitrobenzaldehyde:

$^1\text{H}$  NMR ( $\text{CDCl}_3$ , 400 MHz)

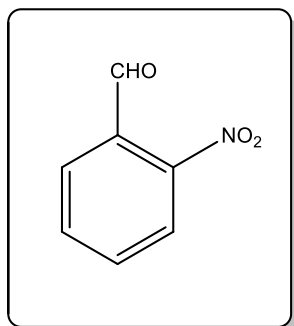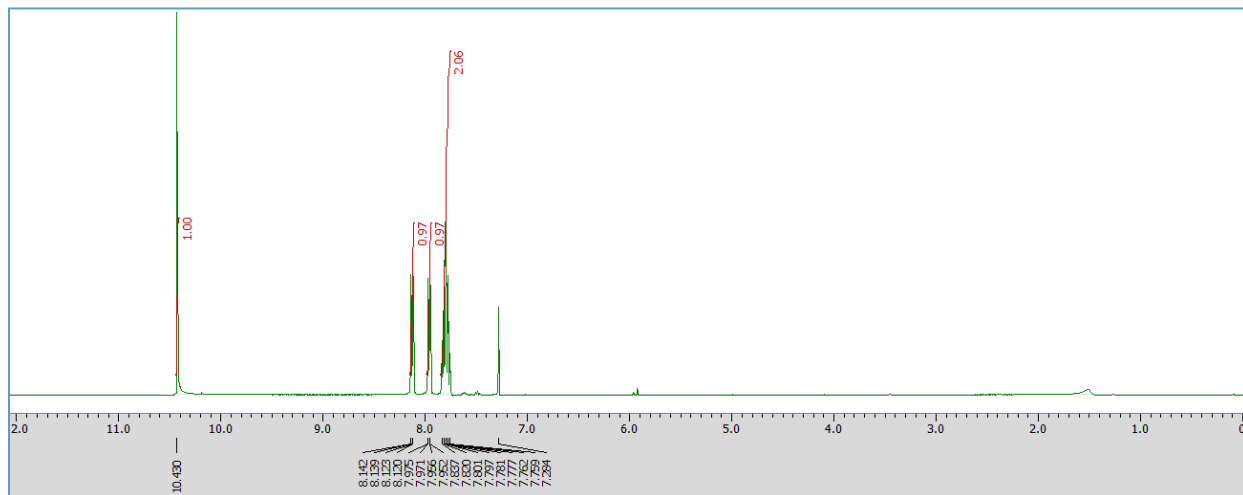

$^{13}\text{C}$  NMR ( $\text{CDCl}_3$ , 100 MHz)

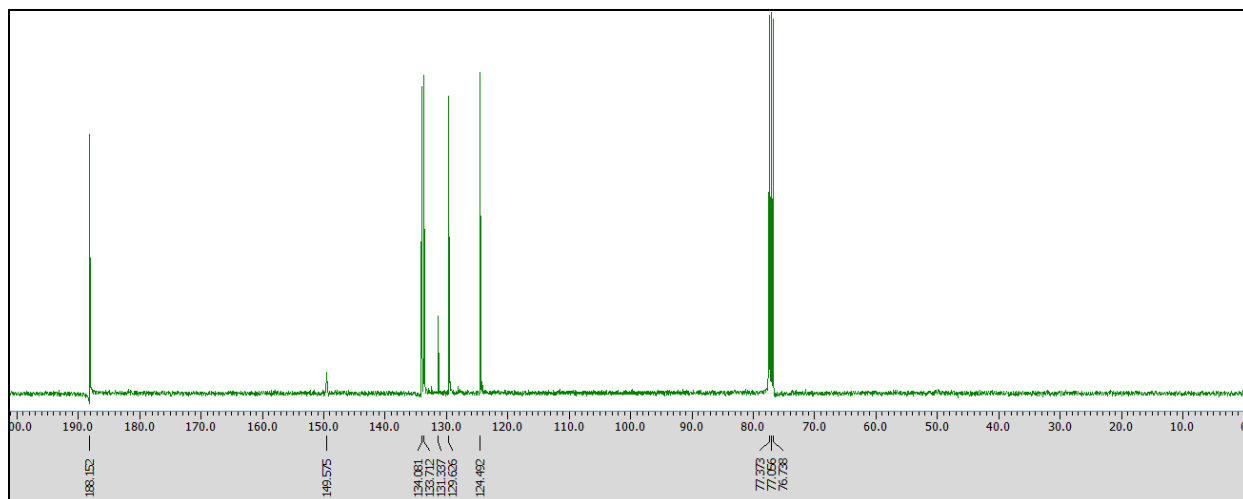

**(2d) 2-methoxybenzaldehyde:**

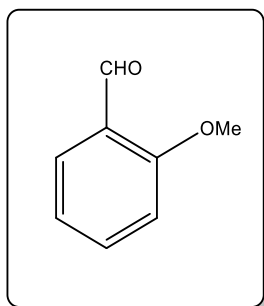

**<sup>1</sup>H NMR (CDCl<sub>3</sub>, 400 MHz)**

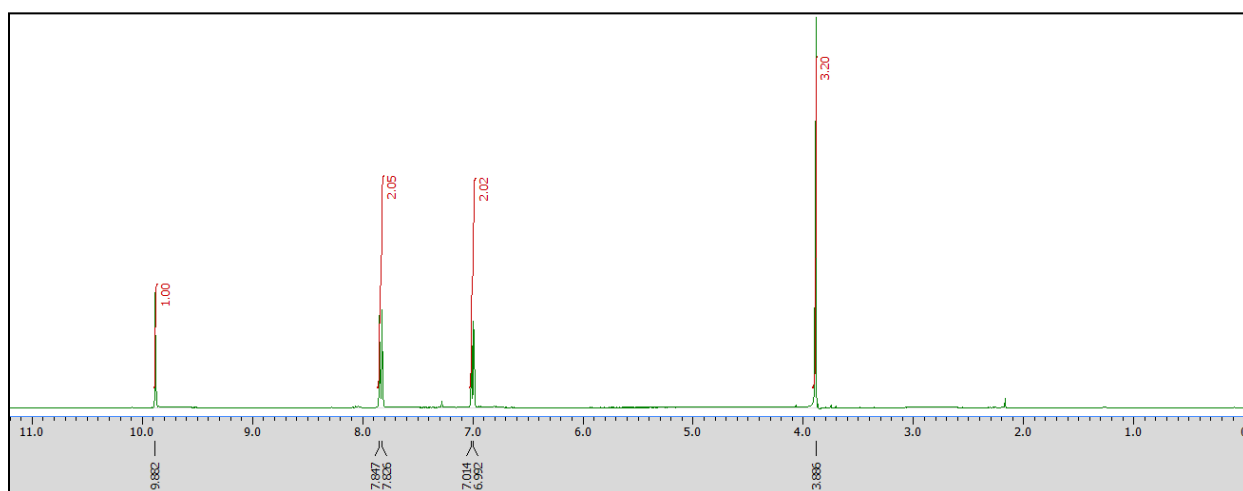

**<sup>13</sup>C NMR (CDCl<sub>3</sub>, 100 MHz)**



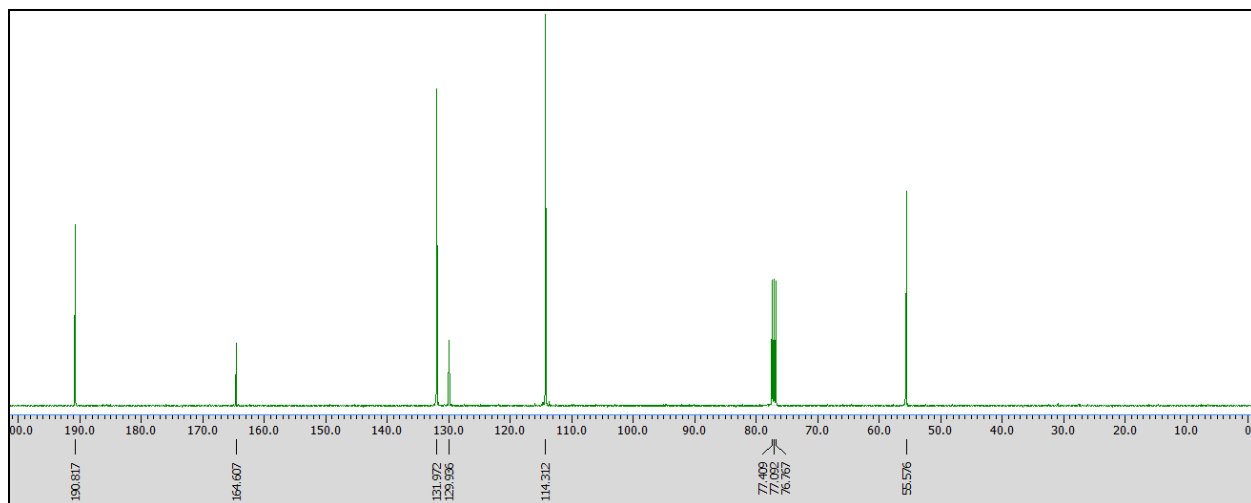

**(2g) 2-methylbenzaldehyde:**

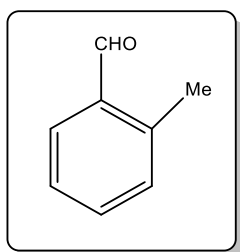

**<sup>1</sup>H NMR (CDCl<sub>3</sub>, 400 MHz)**

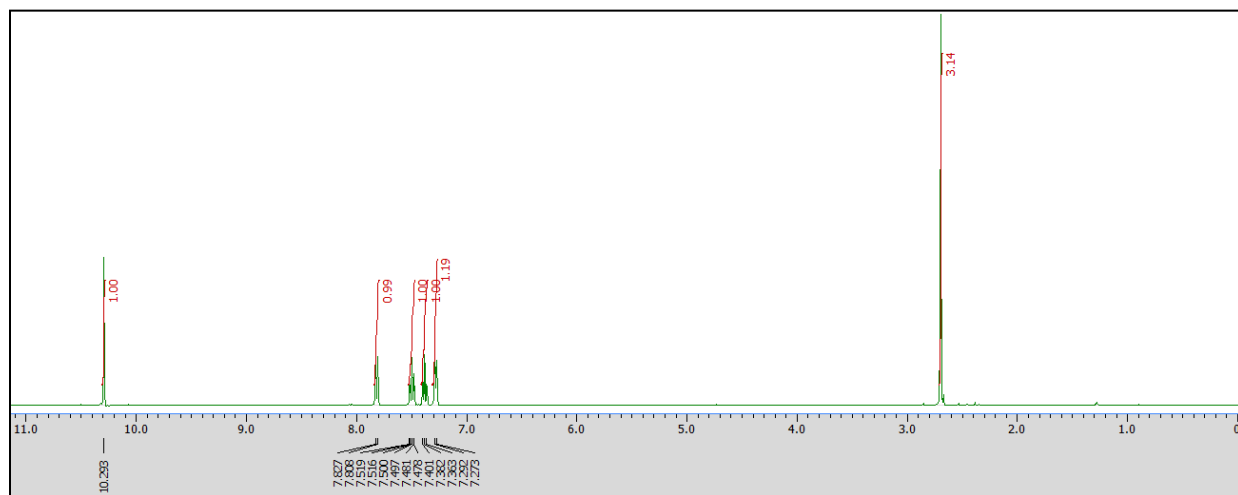

**<sup>13</sup>C NMR (CDCl<sub>3</sub>, 100 MHz)**

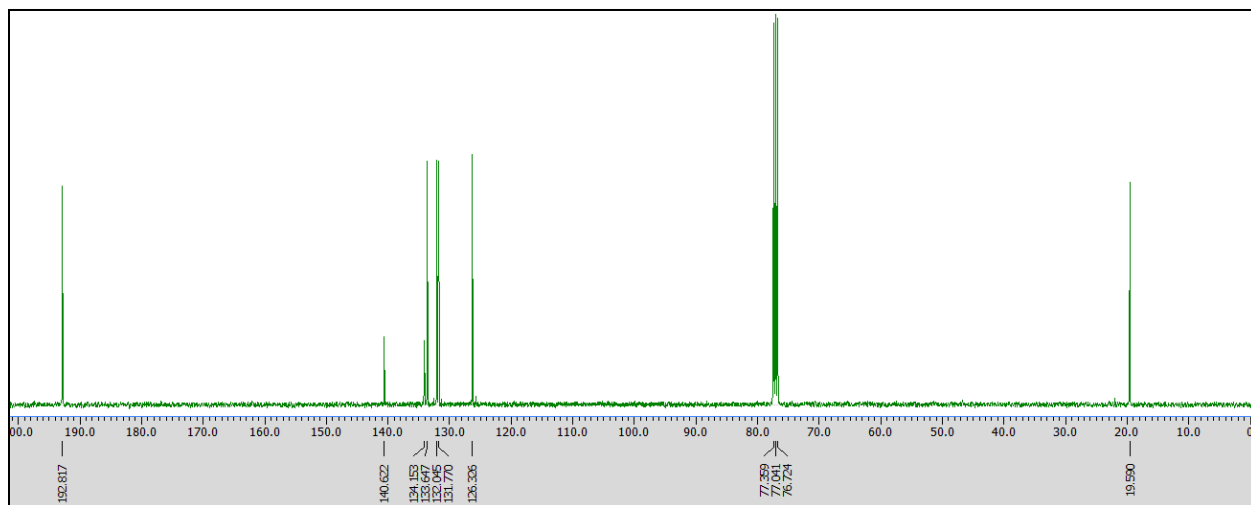

**(4b) 2-(4-nitrobenzylidene)malononitrile:**

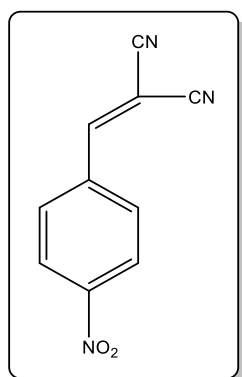

**<sup>1</sup>H NMR (CDCl<sub>3</sub>, 400 MHz)**

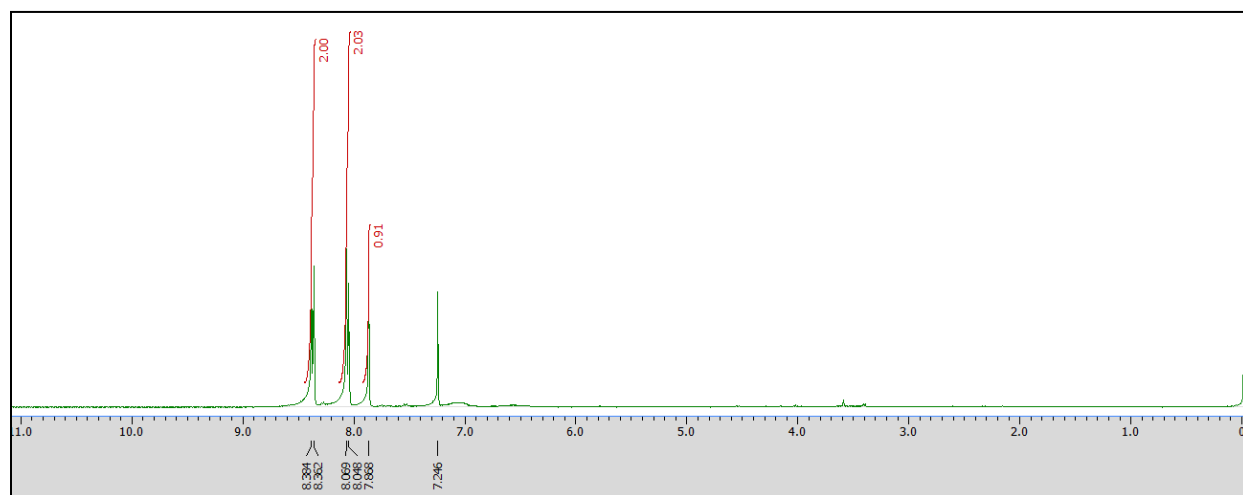

**<sup>13</sup>C NMR (CDCl<sub>3</sub>, 100 MHz)**

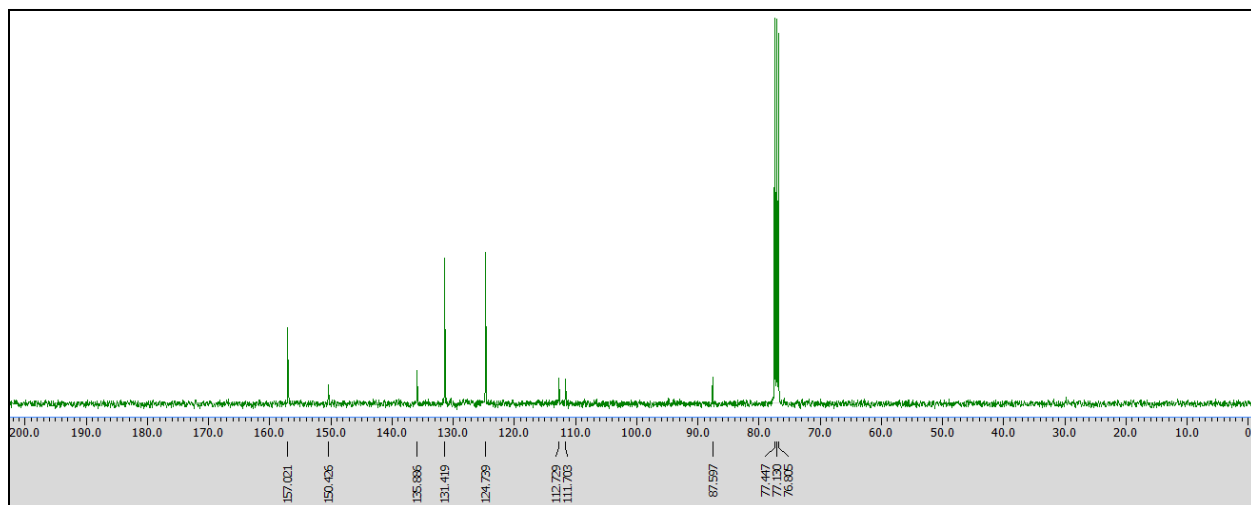

**(4e) 2-(4-methoxybenzylidene)malononitrile:**

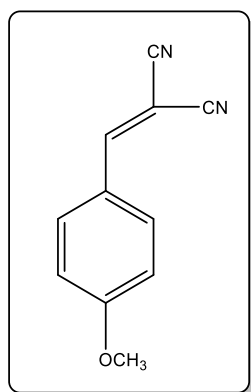

**<sup>1</sup>H NMR (CDCl<sub>3</sub>, 400 MHz)**

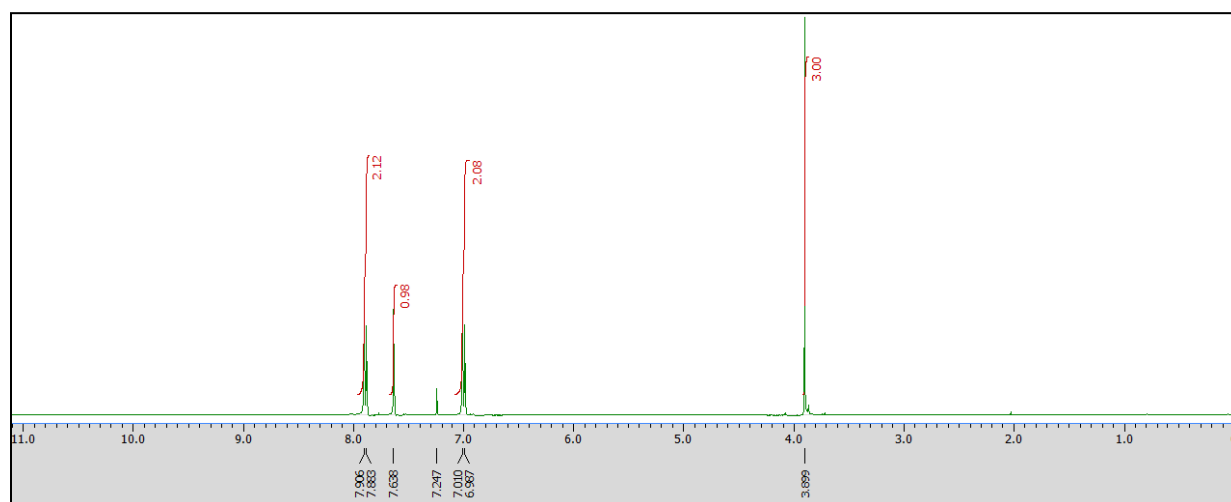

**<sup>13</sup>C NMR (CDCl<sub>3</sub>, 100 MHz)**

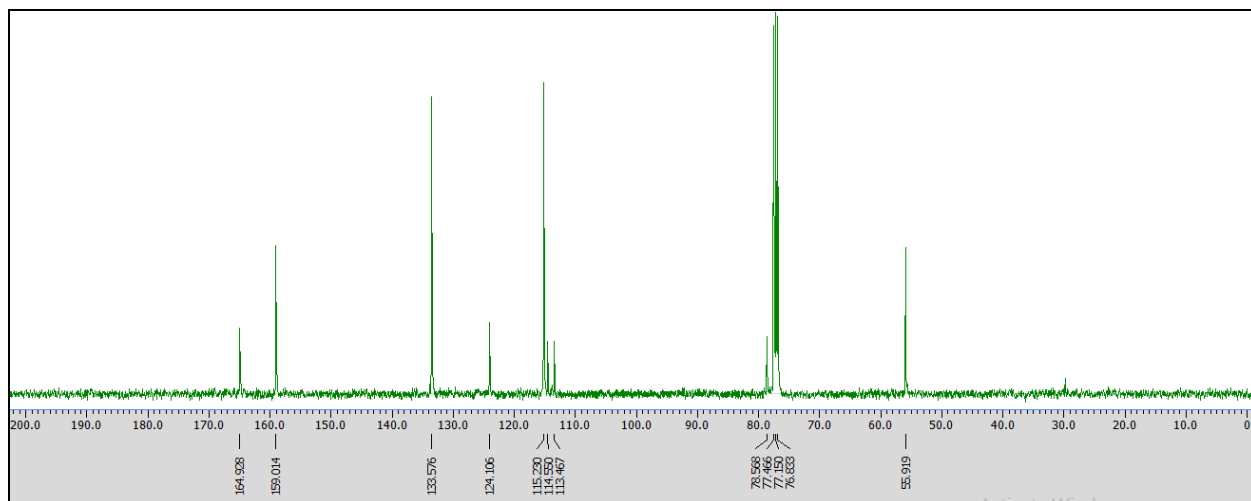

**(4h) 2-(4-methylbenzylidene)malononitrile:**

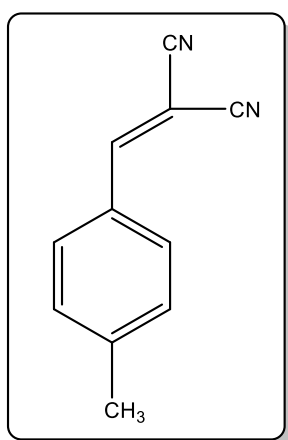

**<sup>1</sup>H NMR (CDCl<sub>3</sub>, 400 MHz)**

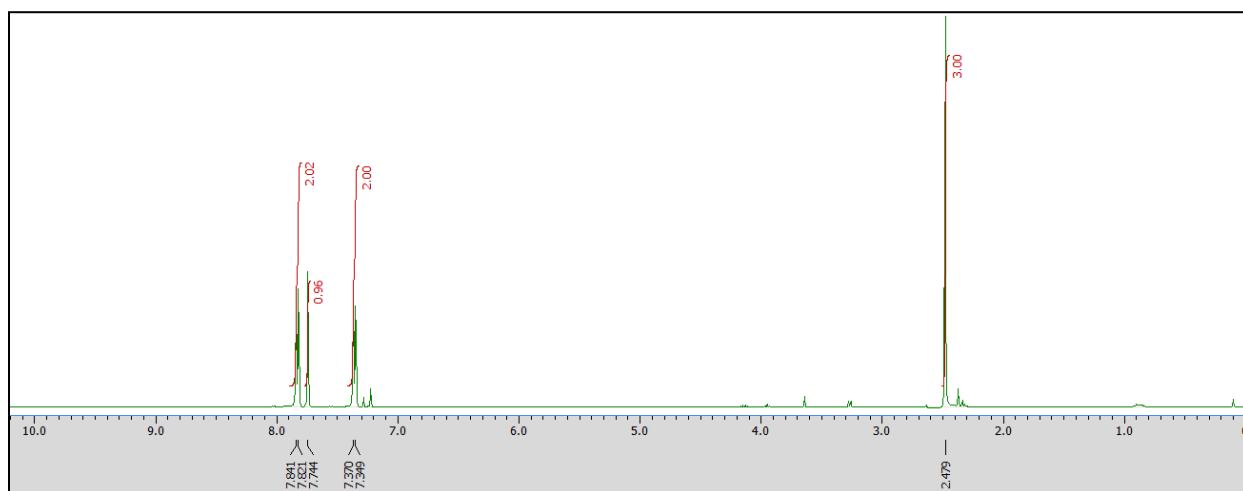

$^{13}\text{C}$  NMR ( $\text{CDCl}_3$ , 100 MHz)

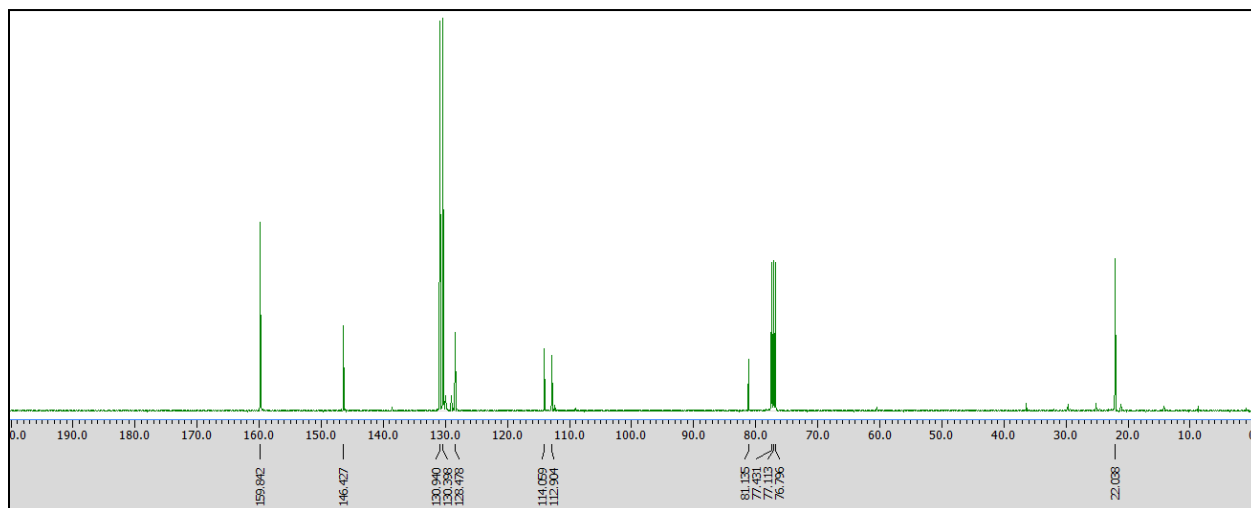

(6a) ethyl (Z)-2-cyano-3-(2-nitrophenyl)acrylate

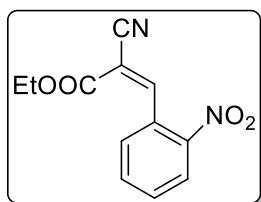

$^1\text{H}$  NMR ( $\text{CDCl}_3$ , 400 MHz)

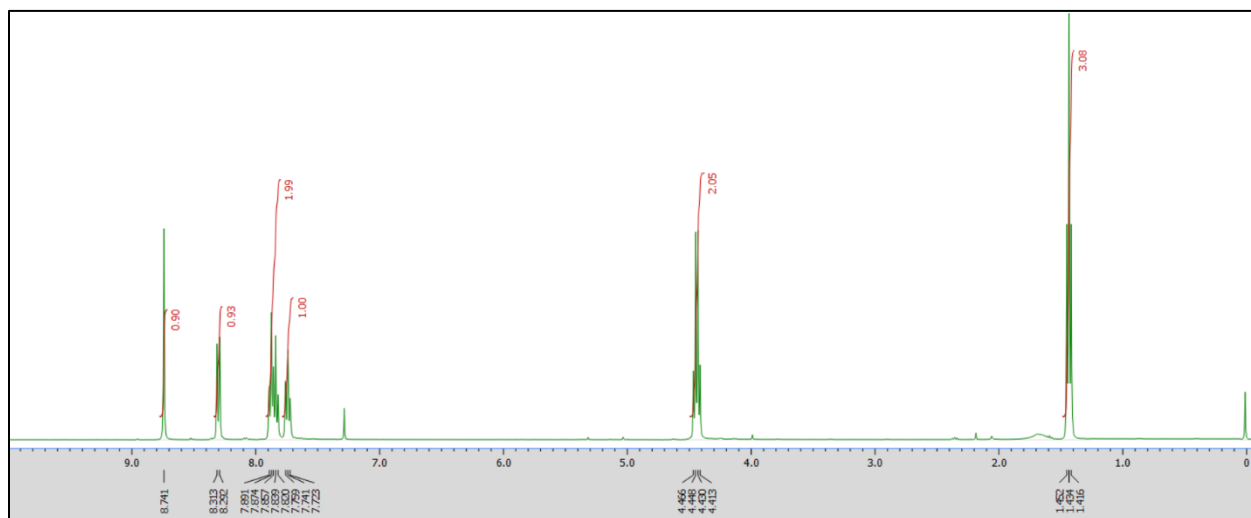

$^{13}\text{C}$  NMR ( $\text{CDCl}_3$ , 100 MHz)

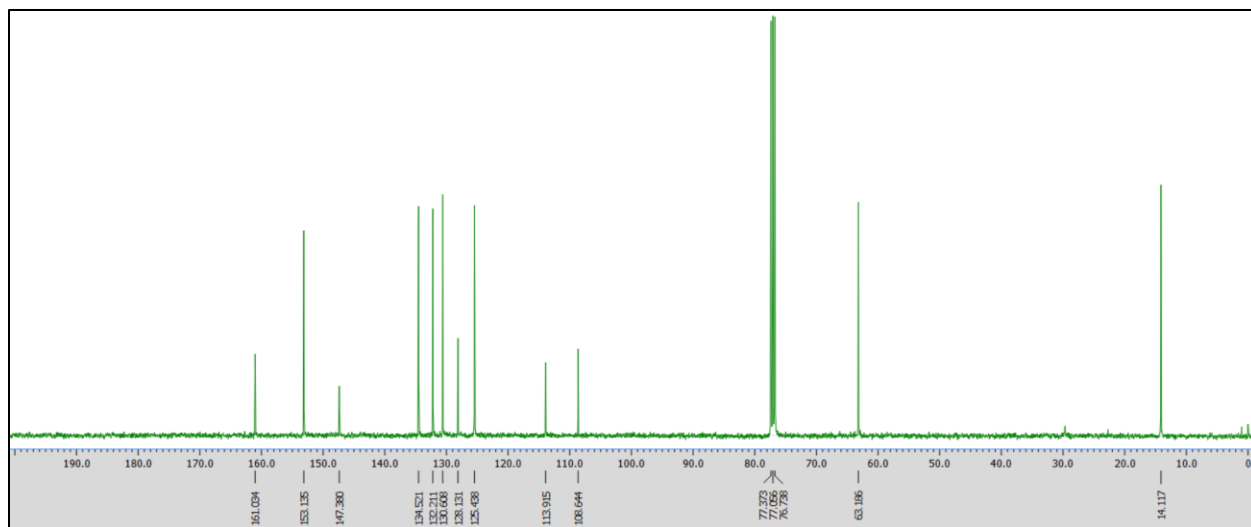

**(6b) ethyl (Z)-2-cyano-3-(4-nitrophenyl)acrylate**

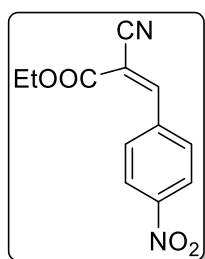

**<sup>1</sup>H NMR (CDCl<sub>3</sub>, 400 MHz)**

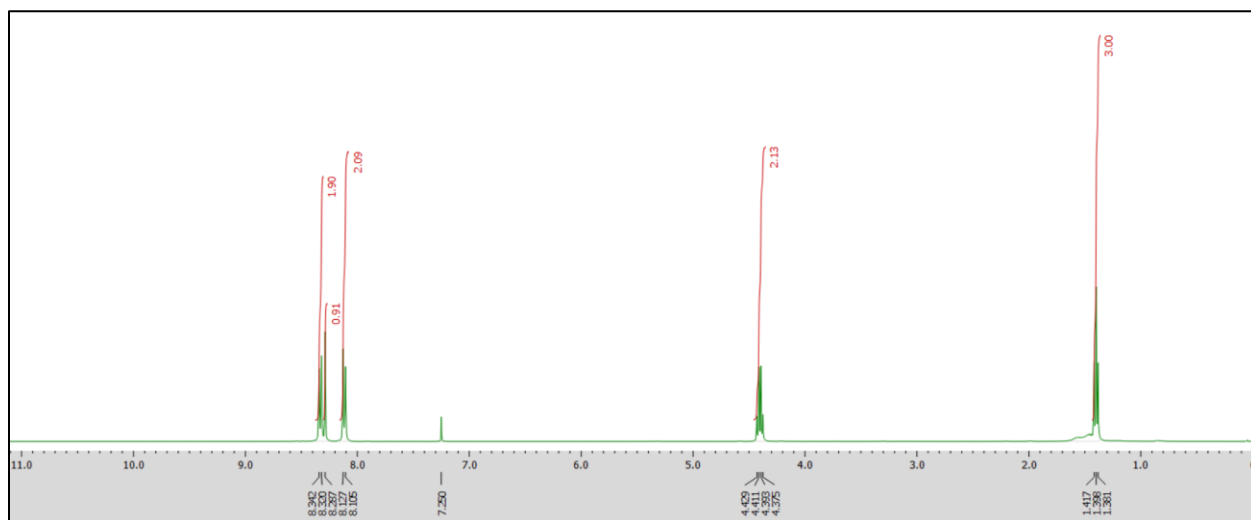

**<sup>13</sup>C NMR (CDCl<sub>3</sub>, 100 MHz)**

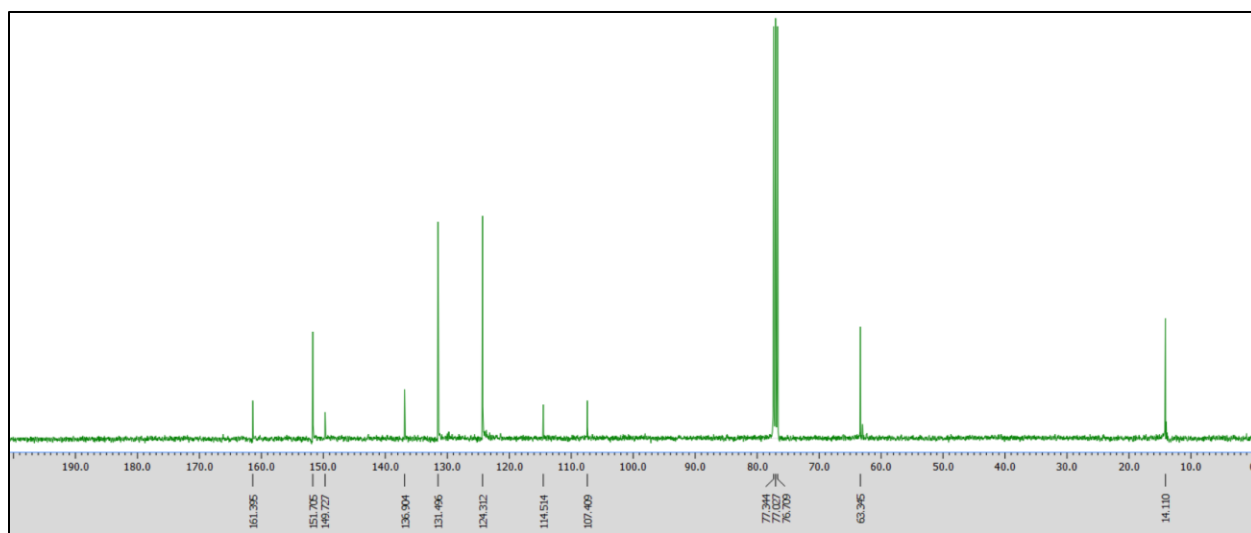

(6c) ethyl (Z)-2-cyano-3-(3-nitrophenyl)acrylate

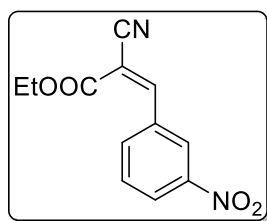

$^1\text{H}$  NMR ( $\text{CDCl}_3$ , 400 MHz)

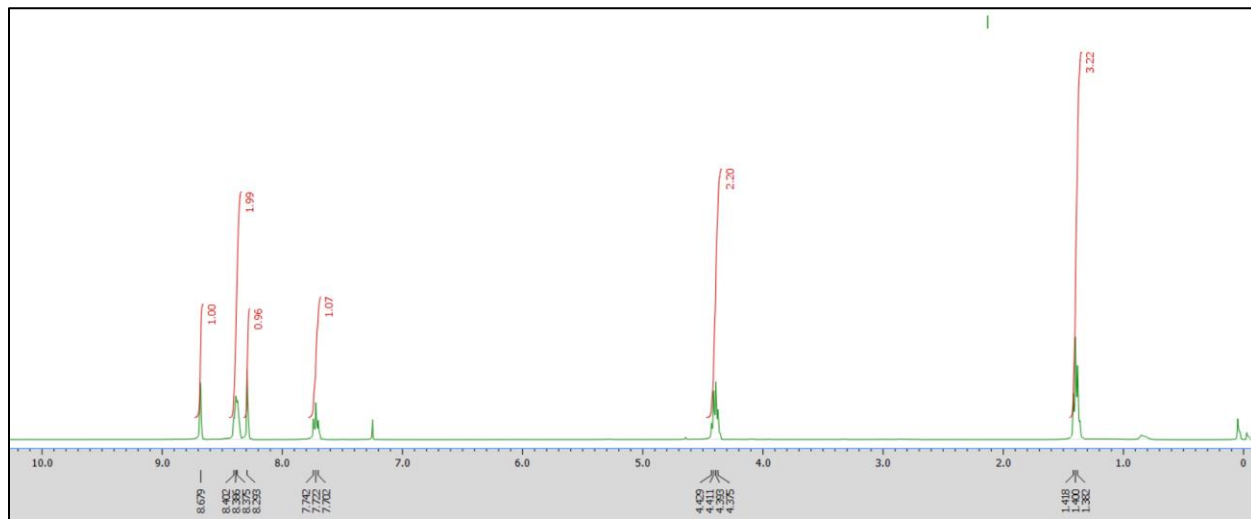

$^{13}\text{C}$  NMR ( $\text{CDCl}_3$ , 100 MHz)

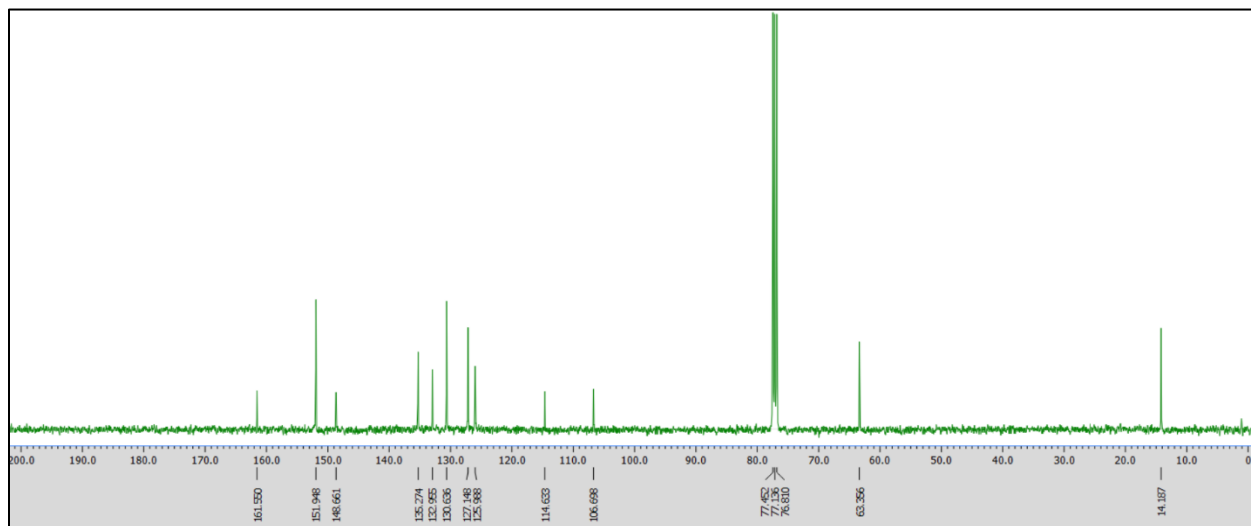



**(6d) ethyl (Z)-2-cyano-3-(4-cyanophenyl)acrylate**

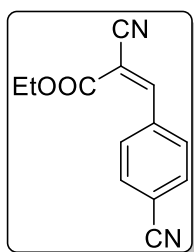

**$^1\text{H}$  NMR (CDCl<sub>3</sub>, 400 MHz)**

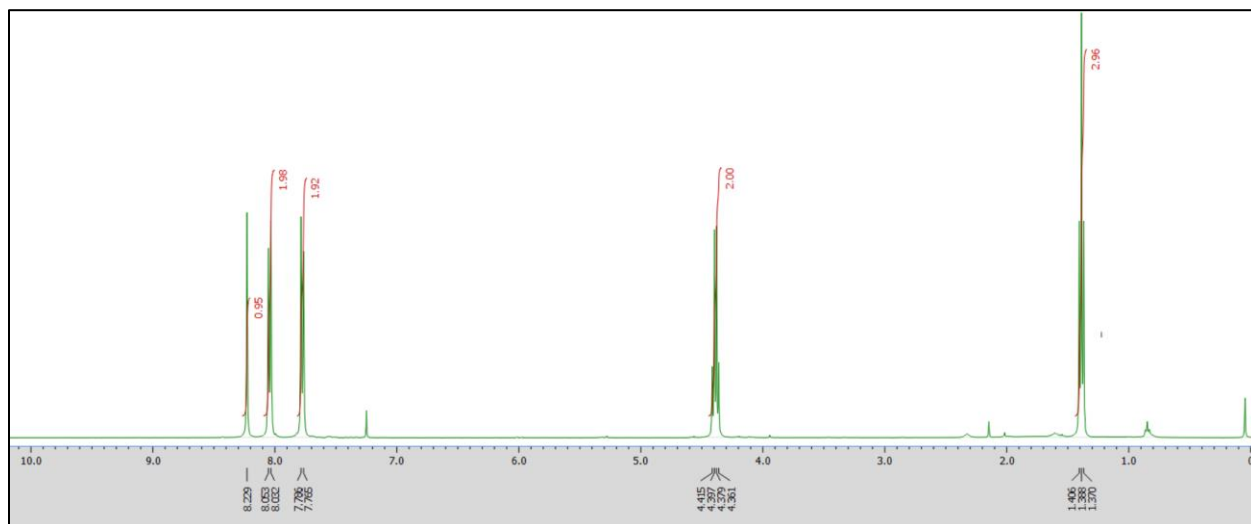

**$^{13}\text{C}$  NMR (CDCl<sub>3</sub>, 100 MHz)**

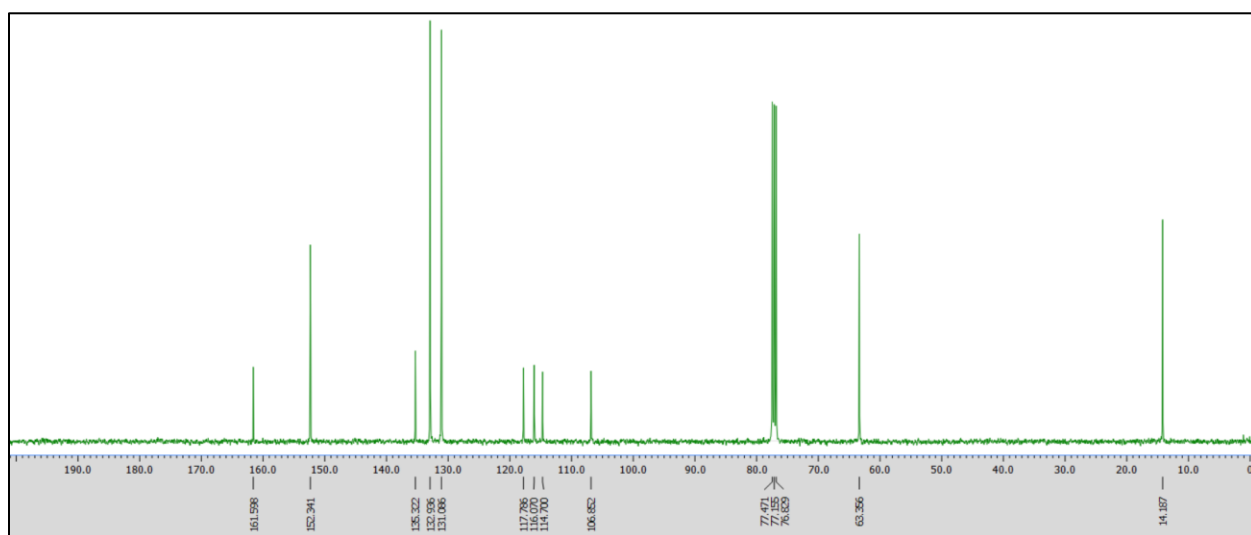

**(8a) (E)-3-(2-nitrophenyl)-1-phenylprop-2-en-1-one**

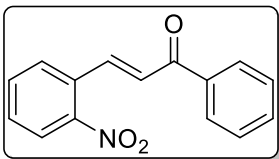

**<sup>1</sup>H NMR (CDCl<sub>3</sub>, 400 MHz)**

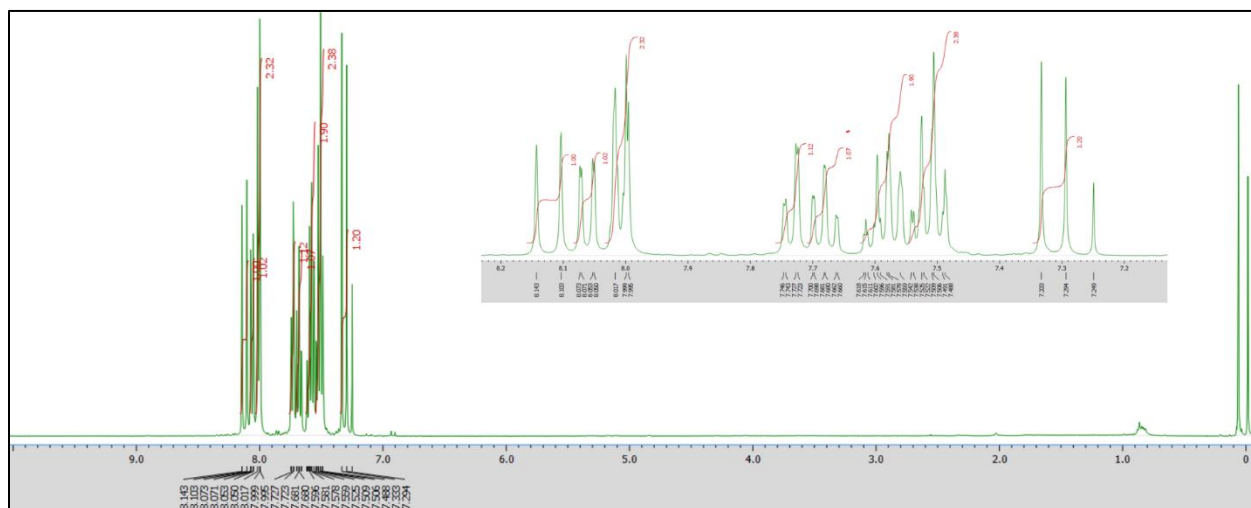

**<sup>13</sup>C NMR (CDCl<sub>3</sub>, 100 MHz)**

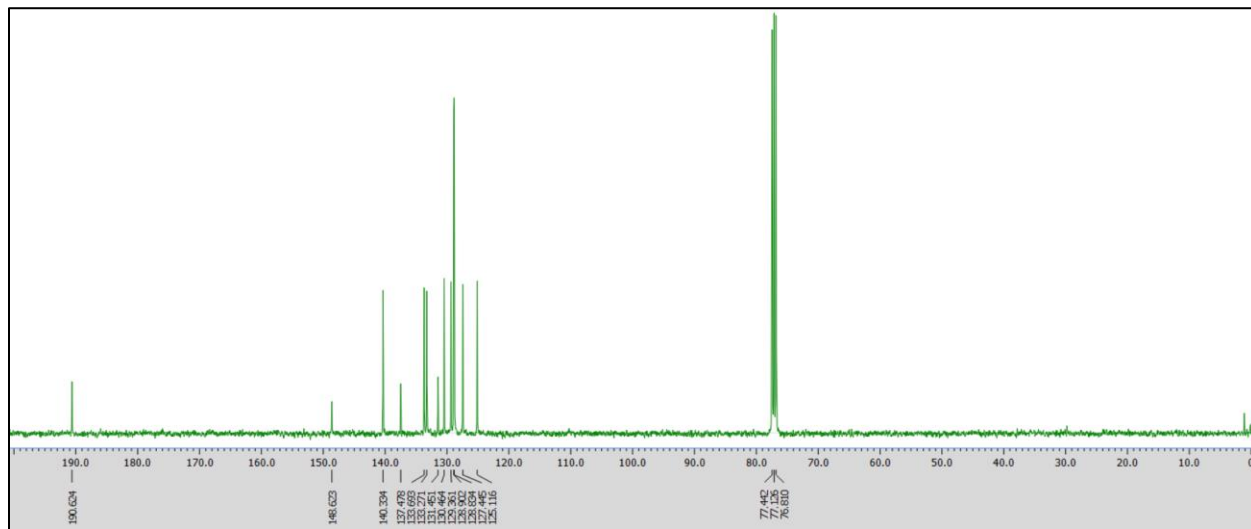

### XPS of Au/MgCe-HDO catalyst

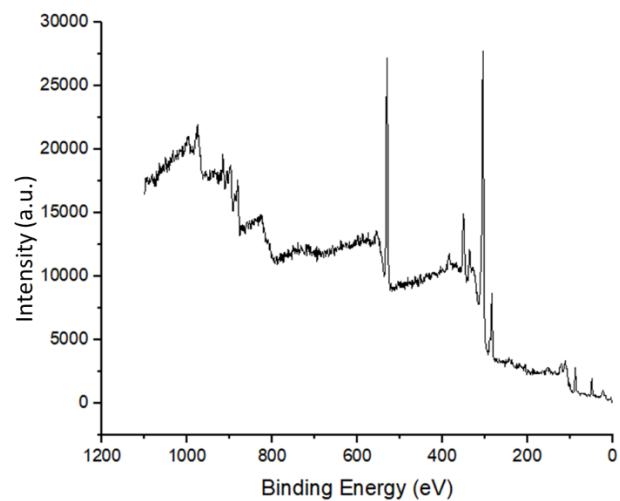

### XPS narrow scan of Mg for Au/MgCe-HDO catalyst.

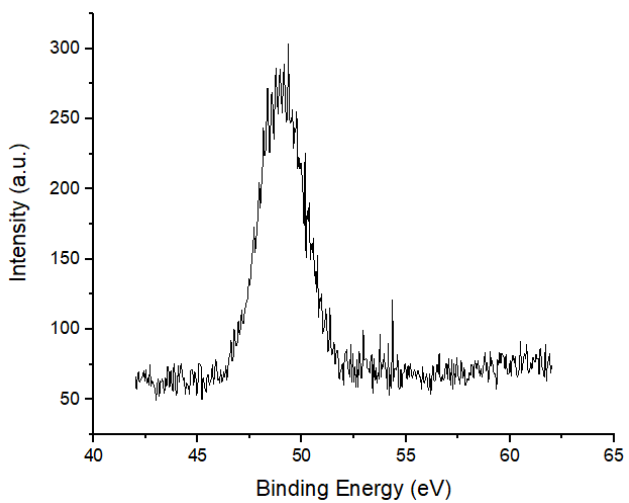

**XPS narrow scan of C for Au/MgCe-HDO catalyst**

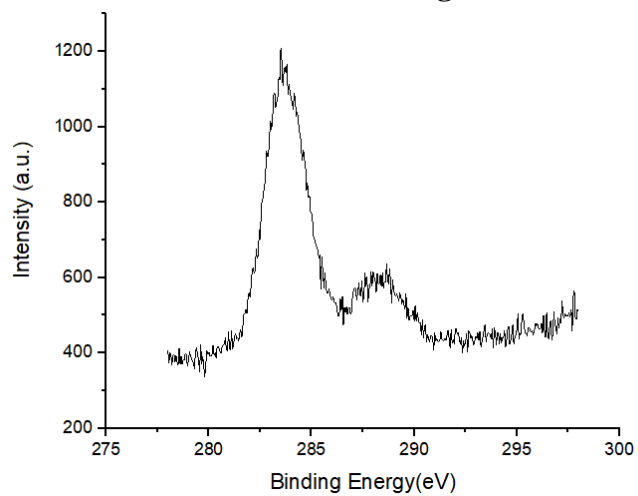

**XPS narrow scan of O for Au/MgCe-HDO catalyst**

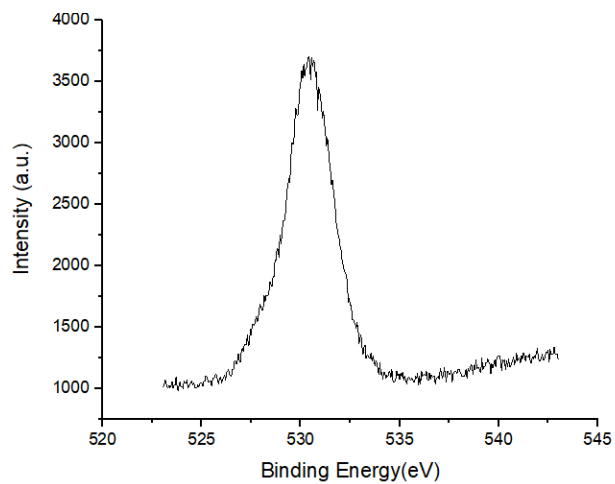

**XPS narrow scan of Ce for Au/MgCe-HDO catalyst.**

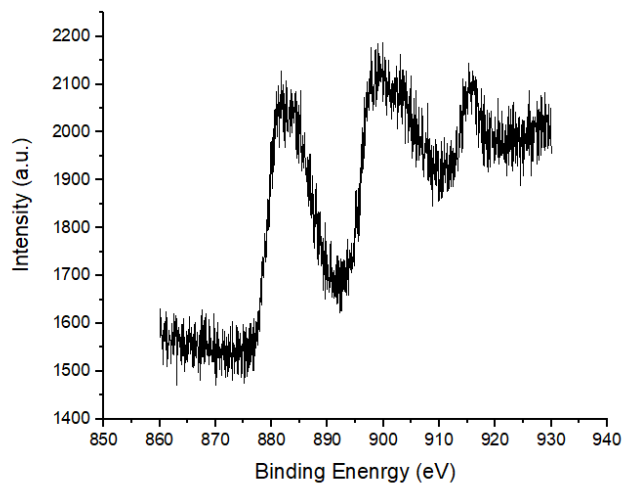

Supplement: d1nj05690e1.pdf [file d1nj05690e1.pdf]
